# Supplementary material for: A comprehensive risk score for effective risk stratification and screening of nasopharyngeal carcinoma
Source: PubMed Central journal article supplement (PMC8408241; doi:10.1038/s41467-021-25402-z), 2021-08-31
Supplement: 41467_2021_25402_MOESM1_ESM.pdf [file 41467_2021_25402_MOESM1_ESM.pdf]

**Title: A Comprehensive Risk Score for Effective Risk Stratification and Screening of**

**Nasopharyngeal Carcinoma**

**Authors:** Xiang Zhou<sup>1</sup>, Su-Mei Cao<sup>1</sup>, Yong-Lin Cai<sup>2</sup>, Xiao Zhang<sup>1</sup>, Shanshan Zhang<sup>1</sup>, Guo-Fei Feng<sup>3</sup>, Yufeng Chen<sup>4</sup>, Qi-Sheng Feng<sup>1</sup>, Yijun Chen<sup>1</sup>, Ellen T. Chang<sup>5,6</sup>, Zhonghua Liu<sup>7</sup>, Hans-Olov Adami<sup>4,8</sup>, Jianjun Liu<sup>9,10</sup>, Weimin Ye<sup>4,11</sup>, Zhe Zhang<sup>3\*</sup>, Yi-Xin Zeng<sup>1\*</sup>, and Miao Xu<sup>1\*</sup>

**Affiliations:**

<sup>1</sup> State Key Laboratory of Oncology in South China, Collaborative Innovation Center for Cancer Medicine, Guangdong Key Laboratory of Nasopharyngeal Carcinoma Diagnosis and Therapy, Sun Yat-sen University Cancer Center, Guangzhou, P. R. China

<sup>2</sup> Department of Clinical Laboratory, Wuzhou Red Cross Hospital, Wuzhou, China

<sup>3</sup> Department of Otolaryngology/Head and Neck Surgery, First Affiliated Hospital of Guangxi Medical University, Nanning, China

<sup>4</sup> Department of Medical Epidemiology and Biostatistics, Karolinska Institutet, Stockholm, Sweden

<sup>5</sup> Center for Health Sciences, Exponent, Menlo Park, CA, USA

<sup>6</sup> Stanford Cancer Institute, Stanford, CA, USA

<sup>7</sup> Department of Statistics and Actuarial Science, The University of Hong Kong, Hong Kong SAR, China

<sup>8</sup> Clinical Effectiveness Group, Institute of Health and Society, University of Oslo, Norway

<sup>9</sup> Human Genetics, Genome Institute of Singapore, Agency for Science, Technology and Research (A\*STAR), Singapore

<sup>10</sup> Department of Medicine, Yong Loo Lin School of Medicine, National University of Singapore, Singapore

<sup>11</sup> Department of Epidemiology and Health Statistics & Key Laboratory of Ministry of Education for Gastrointestinal Cancer, Fujian Medical University, Fuzhou, China

These authors contributed equally: Xiang Zhou, Su-Mei Cao, Yong-Lin Cai and Xiao Zhang.

\*Corresponding authors.

**Corresponding authors:**

Zhe Zhang, MD, PhD, Department of Otolaryngology/Head and Neck Surgery, First Affiliated Hospital of Guangxi Medical University, Nanning 530021, China; E-mail: [zhangzhe@gxmu.edu.cn](mailto:zhangzhe@gxmu.edu.cn)

Yi-Xin Zeng, MD, PhD, State Key Laboratory of Oncology in South China, Collaborative Innovation Center for Cancer Medicine, Guangdong Key Laboratory of Nasopharyngeal Carcinoma Diagnosis and Therapy, Sun Yat-sen University Cancer Center, Guangzhou 510060, China; E-mail: [zengyx@sysucc.org.cn](mailto:zengyx@sysucc.org.cn)

Miao Xu, PhD, State Key Laboratory of Oncology in South China, Collaborative, Innovation Center for Cancer Medicine, Guangdong Key Laboratory of Nasopharyngeal Carcinoma Diagnosis and Therapy, Sun Yat-sen University Cancer Center, Guangzhou 510060, China; E-mail: [xumiao@sysucc.org.cn](mailto:xumiao@sysucc.org.cn)

# Supplementary Figure 1

a

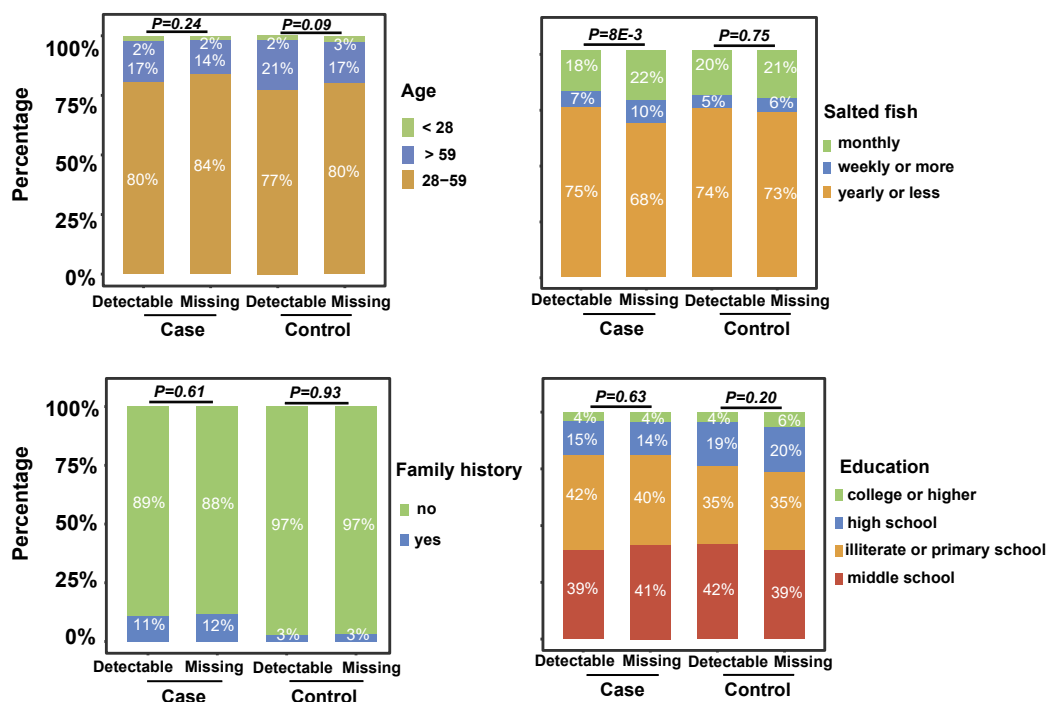

b

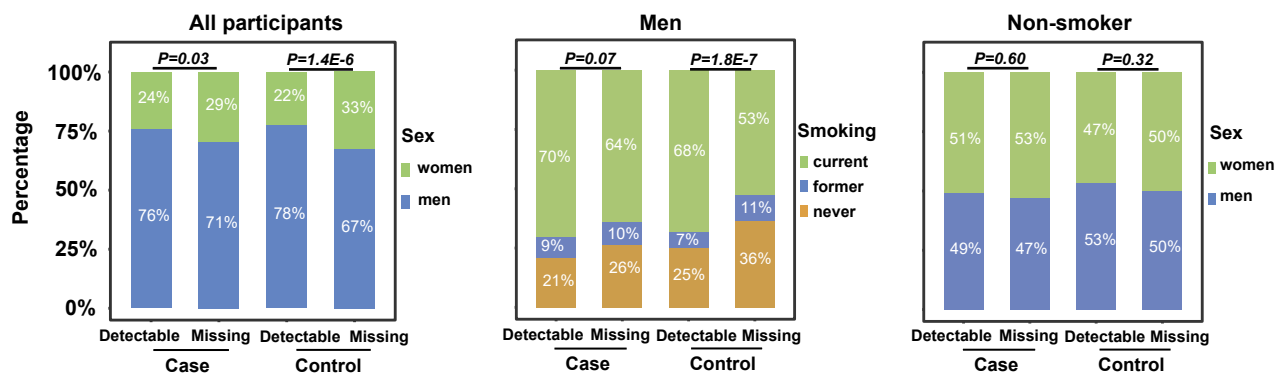

Supplementary Figure 1. Distribution of genotyping success or failure in all study participants. (a) Stacked bar plots indicate the distribution of genotyping success or failure for EBV SNPs (162215, 162476 and 163364). (Variables: age, education, salted-fish consumption and family history). (b) Stacked bar plot representation of the distribution of EBV genotyping success or failure by sex in all participants, by smoking status in men and by sex among non-smokers recruited in this study. The  $P$  values were calculated using  $\chi^2$  tests. Source data of (a, b) are provided in the Source Data file.

## Supplementary Figure 2

a

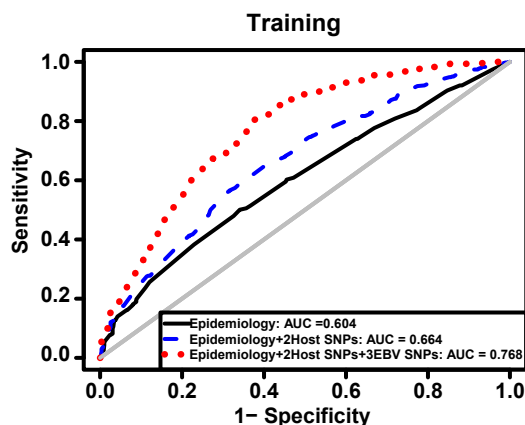

b

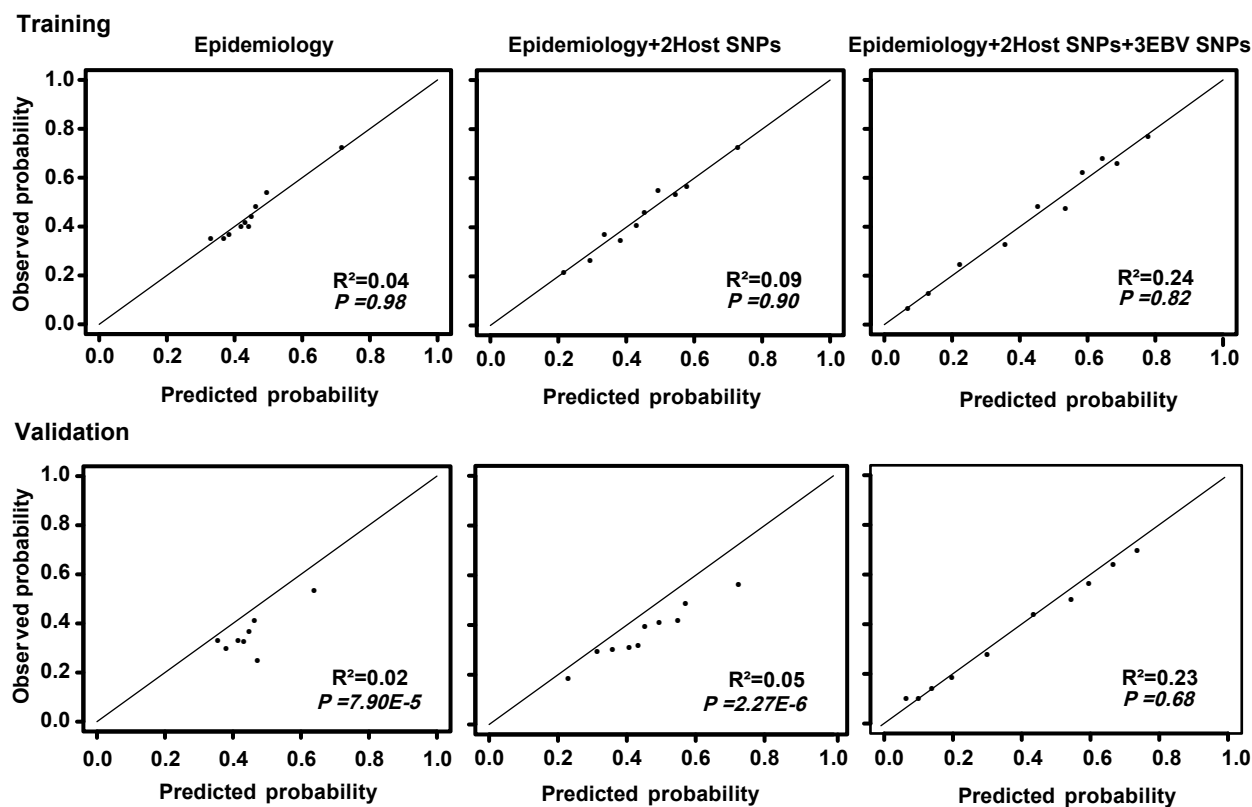

Supplementary Figure 2. Evaluation of comprehensive risk score (CRS) for NPC risk prediction. (a) Receiver operating characteristic (ROC) curve analysis of the training dataset. The area under the ROC curve (AUC) for each model is indicated. (b) Hosmer-Lemeshow goodness-of-fit analyses of the three risk prediction models in training dataset (upper panel) and validation dataset (lower panel). Blackspot: the observed NPC event rates (y-axis) versus the expected event rates (x-axis) as predicted by the three risk prediction models indicated for 10 groups of equal sample size in training dataset (upper panel) and validation dataset (lower panel). Diagonal: the line of perfect fit between the observed and predicted probability.  $R^2$ , Nagelkerke pseudo R-squared.  $P$ : Two-sided Pearson's chi-squared goodness-of-fit test. The three risk prediction models: Epidemiology, model #1; Epidemiology + 2 Host SNPs, model #2; Epidemiology + 2 Host SNPs + 3 EBV SNPs, model #3 (the CRS model).

# Supplementary Figure 3

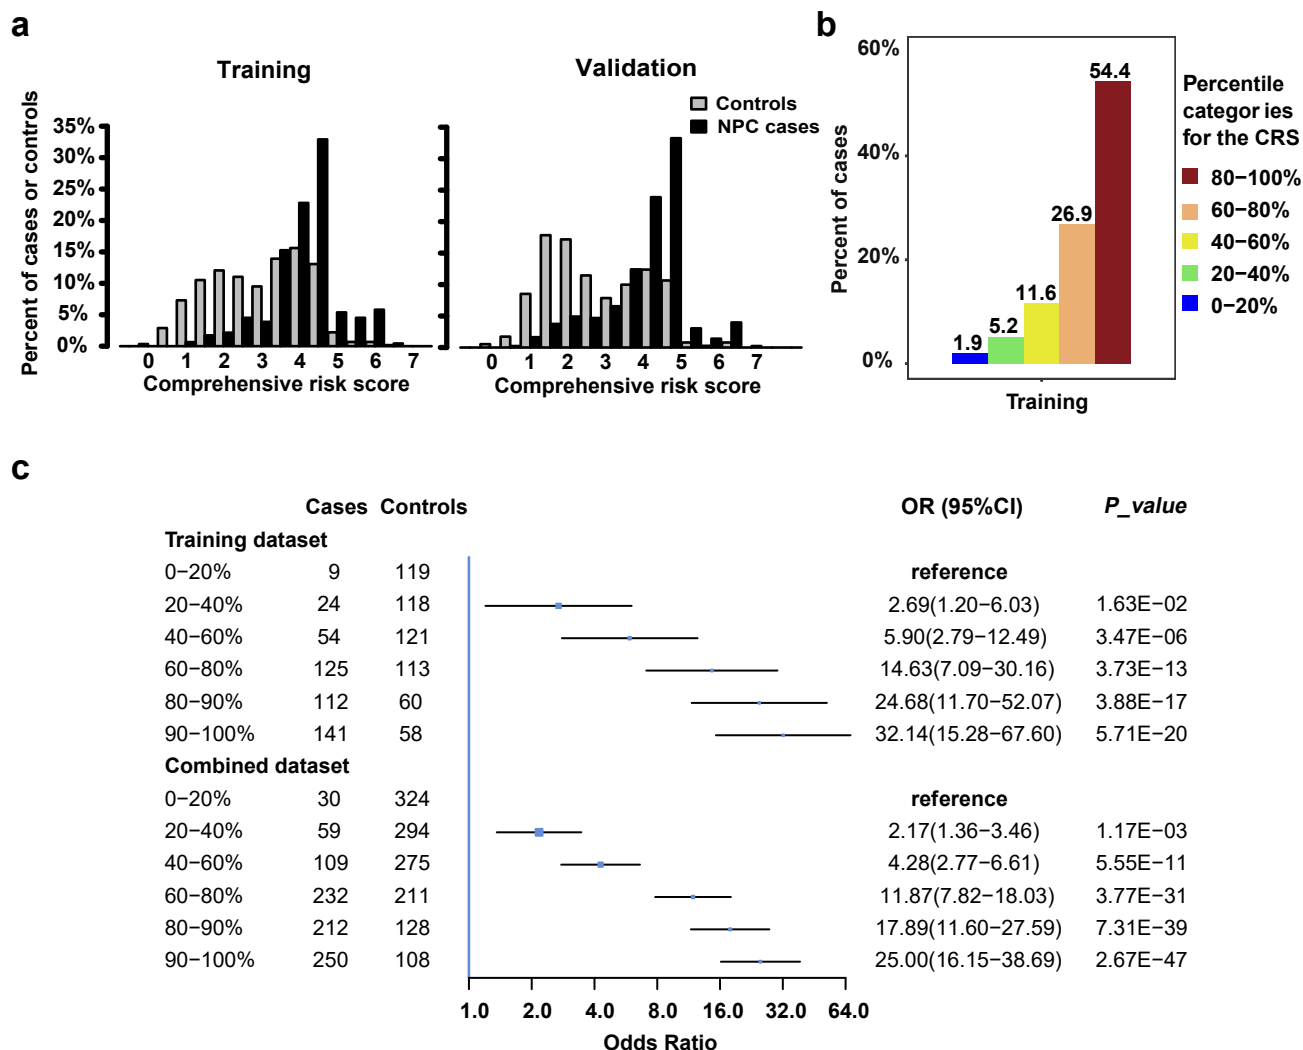

Supplementary Figure 3. NPC risk stratified by comprehensive risk score (CRS). (a) Distribution of the comprehensive risk score (CRS) among patients with NPC and controls in the training and validation datasets. (b) Distribution of patients stratified by the percentile of the CRS among controls. Study subjects in the training dataset were stratified into five categories according to the CRS percentile (0-20%, 20-40%, 40-60%, 60-80% and 80-100%) among the controls in the training dataset. (c) Associations between the CRS and NPC risk in the training (Cases: n=465, Controls: n=589) and combined datasets (Cases: n=892, Controls: n=1340). The training and combined datasets were stratified into five categories (lower four quintiles and top two deciles) according to the CRS percentile among the controls in the training dataset; participants in the bottom quintile of CRS served as the reference group. The odds ratio (OR) of developing NPC was estimated using logistic regression analysis with each group included as a categorical variable. The blue squares represent the odds ratios of each category, and the error bars represent the 95% confidence intervals. CI, confidence interval. Source data of (a,b) are provided in the Source Data file.

## Supplementary Figure 4

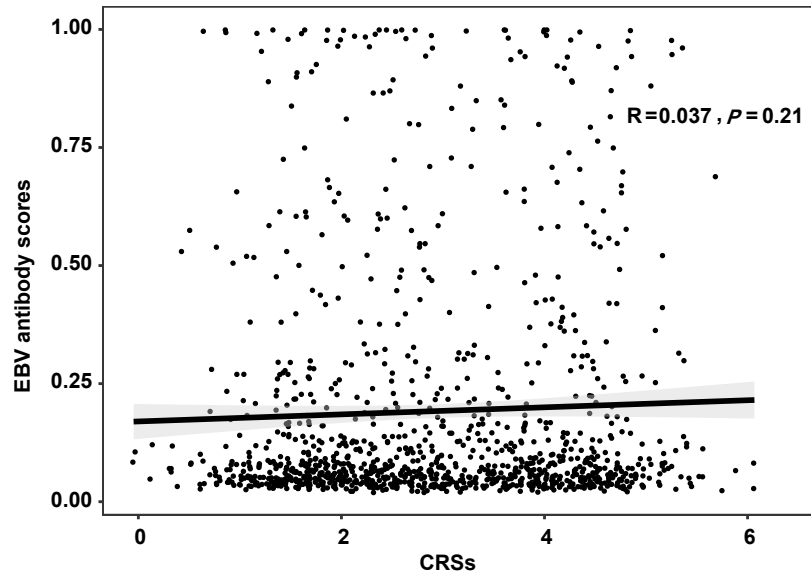

Supplementary Figure 4. Correlation between EBV antibody scores and CRS among the healthy controls in this study. The straight black line represents the best linear fit to our data, and the gray band represents a 95% confidence level. R: Pearson's correlation coefficient. The  $p$  value was calculated using a two-sided paired t-test.

# Supplementary Figure 5

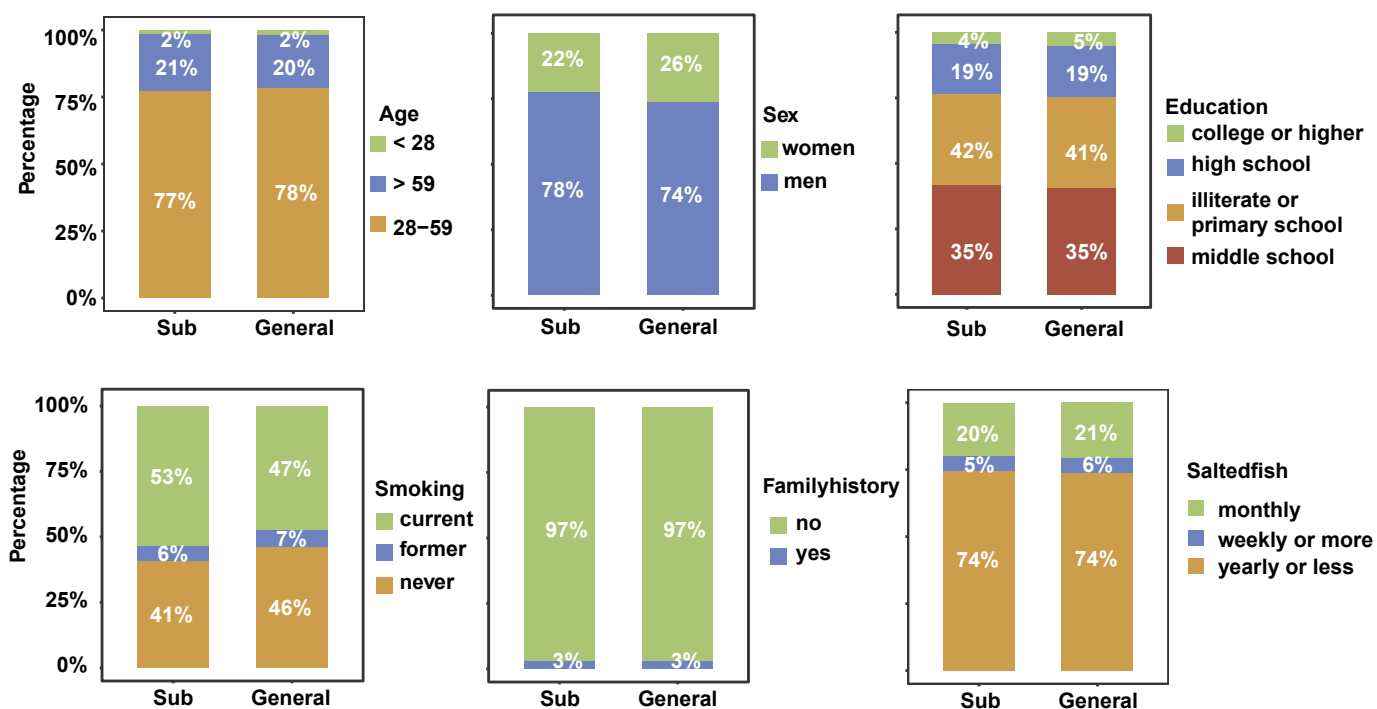

Supplementary Figure 5. Stacked bar plots indicate the distribution of epidemiological risk factors (age, sex, education, salted-fish consumption, smoking, and family history) in the analytic controls and in the population controls of the complete case-control study. Source data are provided in the Source Data file.

## Supplementary Tables

**Supplementary Table 1. Basic characteristics of the patients with NPC and the controls stratified by host risk alleles and EBV risk genotype.**

| Training dataset         | Gene region        | Cases (465)     |                  | Controls (589)  |                  | OR (95% CI)         | P value* |
|--------------------------|--------------------|-----------------|------------------|-----------------|------------------|---------------------|----------|
|                          |                    | Low-risk Allele | High-risk Allele | Low-risk Allele | High-risk Allele |                     |          |
| <b>Host risk allele</b>  |                    |                 |                  |                 |                  |                     |          |
| rs2860580_C              | <i>HLA-A</i>       | 228 (24.5)      | 702 (75.5)       | 433 (36.8)      | 745 (63.2)       | 1.79 (1.47 - 2.18)  | 6.18E-09 |
| rs2894207_T              | <i>HLA-B/C</i>     | 124 (13.3)      | 806 (86.7)       | 257 (21.8)      | 921 (78.2)       | 1.86 (1.46 - 2.36)  | 4.53E-07 |
| rs1412829_T              | <i>CDKN2A/2B</i>   | 91 (9.8)        | 839 (90.2)       | 150 (12.7)      | 1028 (87.3)      | 1.35 (1.01 - 1.79)  | 4.09E-02 |
| rs9510787_G              | <i>TNFRSF19</i>    | 544 (58.5)      | 386 (41.5)       | 746 (63.3)      | 432 (36.7)       | 1.23 (1.03 - 1.47)  | 2.24E-02 |
| rs28421666_A             | <i>HLA-DQ/DR</i>   | 69 (7.4)        | 861 (92.6)       | 108 (9.2)       | 1070 (90.8)      | 1.25 (0.92 - 1.70)  | 1.53E-01 |
| rs31489_C                | <i>CLPTMIL</i>     | 194 (20.9)      | 736 (79.1)       | 278 (23.6)      | 900 (76.4)       | 1.17 (0.95 - 1.44)  | 1.41E-01 |
| rs6774494_A              | <i>MDS1-EVII</i>   | 292 (31.4)      | 638 (68.6)       | 408 (34.6)      | 770 (65.4)       | 1.16 (0.96 - 1.40)  | 1.14E-01 |
| <b>EBV risk genotype</b> |                    |                 |                  |                 |                  |                     |          |
| EBV162215_C              | <i>BALF2-V700L</i> | 19 (4.1)        | 446 (95.9)       | 157 (26.7)      | 432 (73.3)       | 8.63 (5.25 - 14.20) | 2.08E-17 |
| EBV162476_C              | <i>BALF2-I613V</i> | 26 (5.6)        | 439 (94.4)       | 206 (35.0)      | 383 (65.5)       | 9.06 (5.88 - 13.95) | 1.67E-23 |
| EBV163364_T              | <i>BALF2-V317M</i> | 70 (15.1)       | 395 (84.9)       | 317 (53.8)      | 272 (46.2)       | 6.63 (4.89 - 8.98)  | 4.45E-34 |
| Validation dataset       | Gene region        | Cases (427)     |                  | Controls (751)  |                  | OR (95% CI)         | P value* |
|                          |                    | Low-risk Allele | High-risk Allele | Low-risk Allele | High-risk Allele |                     |          |
| <b>Host risk allele</b>  |                    |                 |                  |                 |                  |                     |          |
| rs2860580_C              | <i>HLA-A</i>       | 213 (24.9)      | 641 (75.1)       | 502 (33.4)      | 1000 (66.6)      | 1.58 (1.30 - 1.92)  | 3.69E-06 |
| rs2894207_T              | <i>HLA-B/C</i>     | 107 (12.5)      | 747 (87.5)       | 272 (18.1)      | 1230 (81.9)      | 1.55 (1.21 - 1.98)  | 4.33E-04 |
| rs1412829_T              | <i>CDKN2A/2B</i>   | 77 (9.0)        | 777 (91.0)       | 139 (9.3)       | 1363 (90.7)      | 1.03 (0.77 - 1.38)  | 8.31E-01 |
| rs9510787_G              | <i>TNFRSF19</i>    | 497 (58.2)      | 357 (41.8)       | 941 (62.6)      | 561 (37.4)       | 1.19 (0.99 - 1.42)  | 6.08E-02 |
| rs28421666_A             | <i>HLA-DQ/DR</i>   | 57 (6.7)        | 797 (93.3)       | 137 (9.1)       | 1365 (90.9)      | 1.33 (1.00 - 1.78)  | 5.34E-02 |
| rs31489_C                | <i>CLPTMIL</i>     | 206 (24.1)      | 648 (75.9)       | 415 (27.6)      | 1087 (72.4)      | 1.21 (0.99 - 1.48)  | 5.66E-02 |
| rs6774494_A              | <i>MDS1-EVII</i>   | 257 (30.1)      | 597 (69.9)       | 454 (30.2)      | 1048 (69.8)      | 0.99 (0.82 - 1.19)  | 8.79E-01 |
| <b>EBV risk genotype</b> |                    |                 |                  |                 |                  |                     |          |
| EBV162215_C              | <i>BALF2-V700L</i> | 28 (6.6)        | 399 (93.4)       | 242 (32.2)      | 509 (67.8)       | 6.75 (4.45 - 10.22) | 2.23E-19 |
| EBV162476_C              | <i>BALF2-I613V</i> | 59 (13.8)       | 368 (86.2)       | 397 (52.9)      | 354 (47.1)       | 7.13 (5.21 - 9.76)  | 1.64E-34 |
| EBV163364_T              | <i>BALF2-V317M</i> | 104 (24.4)      | 323 (75.6)       | 513 (68.3)      | 238 (31.7)       | 6.84 (5.20 - 9.00)  | 5.88E-43 |

\*P values for host risk alleles and EBV risk genotype in association with NPC risk were calculated by logistic regression adjusted for age, sex, smoking, salted fish consumption and education.

Abbreviations: OR, odds ratio; CI, confidence interval.



**Supplementary Table 2. Performance of the models for distinguishing NPC cases from population controls in training dataset.**

| Model                                         | Training dataset |             |                  |                |                |                  |
|-----------------------------------------------|------------------|-------------|------------------|----------------|----------------|------------------|
|                                               | AUC              | 95%CI       | Repeated 10-fold | <i>P value</i> | <i>P value</i> | R <sup>2</sup> ¶ |
| Epidemiology model *                          | 0.604            | 0.570-0.639 | 0.585            | 1.42E-18       | -----§         | 0.028            |
| Epidemiology + 2Host SNPs model†              | 0.664            | 0.632-0.697 | 0.647            | 3.92E-14       | 3.29E-04       | 0.060            |
| Epidemiology + 2Host SNPs + 3 EBV SNPs model‡ | 0.768            | 0.740-0.796 | 0.759            | -----§         | 1.42E-18       | 0.172            |

Abbreviations: AUC, area under the curve; CI, confidence interval; Repeated 10-fold, average AUC from repeated 10-fold cross validation.

\* Epidemiological model: smoking, salted fish consumption, education and family history of NPC

† 2 Host SNPs: rs2860580, rs2894207

‡ 3 EBV SNPs: EBV162215, EBV162476 and EBV163364

§ “-----” is a reference model

|| The *P value* was calculated using a two-sided Delong’s test.

¶ McFadden’s Pseudo R<sup>2</sup>

**Supplementary Table 3. The performance of the models for distinguishing the patients with NPC from the controls in training and validation datasets.**

| Model                                             | Training dataset |             |                  |                |                  | Validation dataset |             |                  |                |                  |
|---------------------------------------------------|------------------|-------------|------------------|----------------|------------------|--------------------|-------------|------------------|----------------|------------------|
|                                                   | AUC              | 95%CI       | Repeated 10-fold | <i>P value</i> | R <sup>2</sup> ¶ | AUC                | 95%CI       | Repeated 10-fold | <i>P value</i> | R <sup>2</sup> ¶ |
| 3EBV SNPs model *                                 | 0.708            | 0.683-0.734 | 0.709            | -----§         | 0.132            | 0.745              | 0.719-0.771 | 0.743            | -----§         | 0.157            |
| 3EBV SNPs model + 2Host SNPs model†               | 0.755            | 0.727-0.784 | 0.750            | 1.51E-07       | 0.158            | 0.761              | 0.734-0.789 | 0.757            | 1.20E-02       | 0.163            |
| 3EBV SNPs model + Epidemiology model‡             | 0.742            | 0.713-0.771 | 0.727            | 1.92E-04       | 0.148            | 0.764              | 0.736-0.792 | 0.761            | 2.87E-03       | 0.170            |
| 3EBV SNPs model + 2Host SNPs + Epidemiology model | 0.768            | 0.740-0.796 | 0.759            | 3.17E-10       | 0.172            | 0.772              | 0.745-0.800 | 0.770            | 1.74E-04       | 0.174            |

Abbreviations: AUC, area under the curve; CI, confidence interval; Repeated 10-fold, average AUC from repeated 10-fold cross validation.

\*3 EBV SNPs: EBV162215, EBV162476 and EBV163364

†2 Host SNPs: rs2860580, rs2894207

‡ The epidemiological model included smoking, salted fish consumption, education and family history of NPC

§ “-----” is a reference model

|| The *P* value was calculated using a two-sided Delong’s test.

¶ McFadden’s Pseudo R<sup>2</sup>

**Supplementary Table 4. Net reclassification index for the risk prediction models.**

| Base model                                        | NRI improvement (95% CI)      |                                 |                                             |
|---------------------------------------------------|-------------------------------|---------------------------------|---------------------------------------------|
|                                                   | 3EBV SNPs + 2Host SNPs model† | 3EBV SNPs + Epidemiology model‡ | 3EBV SNPs + 2Host SNPs + Epidemiology model |
| <b>Training</b>                                   |                               |                                 |                                             |
| 3EBV SNPs model *                                 | 0.257(0.195-0.320)            | 0.143(0.098-0.188)              | 0.360(0.291-0.429)                          |
| 3EBV SNPs model + 2Host SNPs model†               | -----                         | 0.088(0.012-0.164)              | 0.149(0.099-0.199)                          |
| 3EBV SNPs model + Epidemiology model‡             |                               | -----                           | 0.214(0.143-0.285)                          |
| 3EBV SNPs model + 2Host SNPs + Epidemiology model |                               |                                 | -----                                       |
| <b>Validation</b>                                 |                               |                                 |                                             |
| 3EBV SNPs model *                                 | 0.212(0.151 - 0.274)          | 0.086(0.050-0.121)              | 0.271(0.207-0.334)                          |
| 3EBV SNPs model + 2Host SNPs model†               | -----                         | 0.110(0.039-0.181)              | 0.102(0.062- 0.141)                         |
| 3EBV SNPs model + Epidemiology model‡             |                               | -----                           | 0.190(0.125-0.254)                          |
| 3EBV SNPs model + 2Host SNPs + Epidemiology model |                               |                                 | -----                                       |

Abbreviations: NRI, net reclassification index; CI, confidence interval.

Note: Reclassification was calculated for strata of predicted risks of < 0.2, 0.2 to 0.4, 0.4 to 0.6, 0.6 to 0.8 and > 0.8.

\*3 EBV SNPs: EBV162215, EBV162476 and EBV163364

†2 Host SNPs: rs2860580, rs2894207

‡ The epidemiological model included smoking, salted fish consumption, education and family history of NPC

**Supplementary Table 5. Prediction accuracy of the serum VCA-/EBNA1-IgA antibody tests and the models combining the serum EBV antibody test results and the comprehensive risk score.**

| Model                                    | Cut off                           | Training dataset |             |        |        | Validation dataset |             |         |        |
|------------------------------------------|-----------------------------------|------------------|-------------|--------|--------|--------------------|-------------|---------|--------|
|                                          |                                   | Sensitivity      | Specificity | PPV    | NPV    | Sensitivity        | Specificity | PPV     | NPV    |
| VCA-/EBNA1-IgA                           | $P \geq 0.98$                     | 86.28%           | 96.03%      | 3.38%  | 99.98% | 73.61%             | 98.36%      | 6.72%   | 99.96% |
| CRS (Top 40 percentile) + VCA-/EBNA1-IgA | $CRS \geq 3.23$ and $P \geq 0.98$ | 70.57%           | 98.96%      | 9.80%  | 99.95% | 54.88%             | 99.85%      | 37.13%  | 99.93% |
| CRS (Top 30 percentile) + VCA-/EBNA1-IgA | $CRS \geq 3.62$ and $P \geq 0.98$ | 60.10%           | 99.58%      | 18.78% | 99.94% | 45.91%             | 100.00%     | 100.00% | 99.91% |
| CRS (Top 20 percentile) + VCA-/EBNA1-IgA | $CRS \geq 3.88$ and $P \geq 0.98$ | 48.13%           | 99.79%      | 27.02% | 99.92% | 34.04%             | 100.00%     | 100.00% | 99.89% |
| CRS (Top 10 percentile) + VCA-/EBNA1-IgA | $CRS \geq 4.30$ and $P \geq 0.98$ | 29.93%           | 99.79%      | 18.72% | 99.89% | 21.11%             | 100.00%     | 100.00% | 99.87% |

Abbreviations: CRS, comprehensive risk score; AUC, area under the curve; PPV: positive predictive value; NPV: negative predictive value.

**Supplementary Table 6. The distribution of three EBV variants in samples from southern China and Indonesia.**

| Southern China | NPC Cases (465)    |                     | Controls (589)     |                     |
|----------------|--------------------|---------------------|--------------------|---------------------|
|                | Low-risk<br>Allele | High-risk<br>Allele | Low-risk<br>Allele | High-risk<br>Allele |
| EBV162215_C    | 47 (5%)            | 845 (95%)           | 399 (30%)          | 941 (70%)           |
| EBV162476_C    | 85 (10%)           | 807 (90%)           | 603 (45%)          | 737 (55%)           |
| EBV163364_T    | 174 (20%)          | 718 (80%)           | 830 (62%)          | 510 (38%)           |
| Indonesia      | NPC Cases (20)     |                     | Controls (4)       |                     |
|                | Low-risk<br>Allele | High-risk<br>Allele | Low-risk<br>Allele | High-risk<br>Allele |
| EBV162215_C    | 1 (5%)             | 19 (95%)            | 0 (0%)             | 4 (100%)            |
| EBV162476_C    | 6 (30%)            | 14 (70%)            | 0 (0%)             | 4 (100%)            |
| EBV163364_T    | 18 (90%)           | 2 (10%)             | 4 (100%)           | 0 (0%)              |

**Supplementary Table 7. Tumor stages of the NPC cases in the training and validation datasets.**

| Tumor Stages* | Training dataset |        | Validation dataset |        |
|---------------|------------------|--------|--------------------|--------|
|               | cases(n=465)     |        | cases(n=427)       |        |
|               | no.              | %      | no.                | %      |
| I             | 9                | 1.94%  | 7                  | 1.64%  |
| II            | 50               | 10.75% | 22                 | 5.15%  |
| III           | 172              | 36.99% | 160                | 37.47% |
| IV            | 210              | 45.16% | 190                | 44.50% |
| Missing       | 24               | 5.16%  | 48                 | 11.24% |

\*Seventh edition (2010) of the AJCC/UICC staging system for NPC.

**Supplementary Table 8. EBV variants detected in 19 healthy donors through a three-time re-sampling during a four-week interval.**

| Tests # | Detection rate*(No.) | Total detectable rate (No.) |
|---------|----------------------|-----------------------------|
| Week 0  | 68% (13)             | 68% (13)                    |
| Week 2  | 63% (12)             | 89% (17)                    |
| Week 4  | 74% (14)             | 95% (18)                    |

\* Detection rate calculated by No./Total (19).

Source data are provided in the Source Data file.

**Supplementary Table 9. Summary statistics on the seven human SNPs and three EBV SNPs from published studies.**

| SNP          | Gene loci           | Chr | Cases | Controls | OR   | <i>P value</i> | Article                                       |
|--------------|---------------------|-----|-------|----------|------|----------------|-----------------------------------------------|
| rs2860580_C  | <i>HLA-A</i>        | 6   | 5090  | 4957     | 1.72 | 4.88E-67       | Bei JX,Nat Genet. 2010                        |
| rs2894207_T  | <i>HLA-B/C</i>      | 6   | 5090  | 4957     | 1.64 | 3.42E-33       | Bei JX,Nat Genet. 2010                        |
| rs1412829_T  | <i>CDKN2A/2B</i>    | 9   | 6868  | 9119     | 1.25 | 2.80E-08       | Bei JX,Cancer Epidemiol Biomarkers Prev. 2016 |
| rs9510787_G  | <i>TNFRSF19</i>     | 13  | 6868  | 9119     | 1.16 | 5.00E-10       | Bei JX,Cancer Epidemiol Biomarkers Prev. 2016 |
| rs28421666_A | <i>HLA-DQ/DR</i>    | 6   | 5090  | 4957     | 1.49 | 2.49E-18       | Bei JX,Nat Genet. 2010                        |
| rs31489_C    | <i>CLPTM1L/TERT</i> | 5   | 6868  | 9119     | 1.23 | 6.30E-13       | Bei JX,Cancer Epidemiol Biomarkers Prev. 2016 |
| rs6774494_A  | <i>MECOM</i>        | 3   | 6868  | 9119     | 1.19 | 1.50E-12       | Bei JX,Cancer Epidemiol Biomarkers Prev. 2016 |
| EBV162215_C  | <i>BALF2/V700L</i>  | EBV | 639   | 652      | 7.62 | 1.42E-18       | Xu M,Nat Genet. 2019                          |
| EBV162476_C  | <i>BALF2/I613V</i>  | EBV | 639   | 652      | 8.79 | 9.69E-25       | Xu M,Nat Genet. 2019                          |
| EBV163364_T  | <i>BALF2/V317M</i>  | EBV | 639   | 652      | 6.52 | 2.40E-32       | Xu M,Nat Genet. 2019                          |

Abbreviations: Chr, chromosome; OR, odds ratio.



**Supplementary Table 10. PCR primers and Unique Extend Primer (UEP) for MassArray genotyping of the seven human SNPs and three EBV SNPs.**

| SNP_ID     | 2nd-PCR                         | 1st-PCR                         | UEP-SEQ                    |
|------------|---------------------------------|---------------------------------|----------------------------|
| EBV162215  | ACGTTGGATGACAGCATCAGCACCTTGGAC  | ACGTTGGATGACCTGCGACCTGCCAGACCT  | CAGCCGCCGGCCGTACA          |
| EBV162476  | ACGTTGGATGGTGAGCGGTAAAACAACCTGG | ACGTTGGATGTACCACGTGATGCAGTACTC  | CGCACGCCGCCTGCCCC          |
| EBV163364  | ACGTTGGATGAGGCTGGCATTATATCGGTG  | ACGTTGGATGCCTGTTTGCCGACTGTGAG   | TATCGGTGTAACGCAGCCA        |
| rs2860580  | ACGTTGGATGTGGCAGAAGTGGAAAGCAAAC | ACGTTGGATGGGCTTTTCCCTGCTTCATTG  | GAAGCAAACCCGTCCTTCTTCA     |
| rs2894207  | ACGTTGGATGGCTTATGGTTTCTTCTAAGAG | ACGTTGGATGTGCAAAGAATAAAGCTGG    | GTTTCTTCTAAGAGTTCTCTAAT    |
| rs1412829  | ACGTTGGATGCATGCTTTGGGAAACTCTAC  | ACGTTGGATGCCATTGCTATGGTTACTATC  | CTACCCATGAGATTCATATTCAAGC  |
| rs9510787  | ACGTTGGATGGGCTGACCTGCAACTCTTAG  | ACGTTGGATGGATTTATTACTTATTGGTGC  | gTCATAGTCTTAGAAGACAGC      |
| rs28421666 | ACGTTGGATGGTGGTGATGTTTTTATAGCC  | ACGTTGGATGCTGAGTGTCAATTAAGATCCT | ATCTATACTGTGATATTTATATTTAT |
| rs31489    | ACGTTGGATGTACACTTTCAGCCTGGTGAC  | ACGTTGGATGCTCGCATTCCACCTGTTTAC  | ACAGCGAGACCTgtTCTCAAAAAAGA |
| rs6774494  | ACGTTGGATGTACGGTAGATGCCATTAAGG  | ACGTTGGATGCTATCTTACTTACATTTACC  | gcGGAAAACAGTCAATATGTCAC    |
